# Supplementary material for: Multi-decadal fluctuations in root zone storage capacity through vegetation adaptation to hydro-climatic variability has minor effects on the hydrological response in the Neckar basin, Germany
Source: Copernicus journal article supplement (doi:10.5194/hess-2024-62), 2024-03-04
Supplement: Supplementary file 1 [file hess-2024-62-supplement.pdf]

Supplementary Material

for

**Multi-decadal fluctuations in root zone storage capacity through vegetation adaptation to hydro-climatic variability has minor effects on the hydrological response in the Neckar basin, Germany.**

Siyuan Wang<sup>1</sup>, Markus Hrachowitz<sup>1</sup>, Gerrit Schoups<sup>1</sup>,

<sup>1</sup>Department of Water Management, Faculty of Civil Engineering and Geosciences, Delft University of Technology, Stevinweg 1, 2628CN Delft, Netherlands

*Correspondence to:* Siyuan Wang (S.Wang-9@tudelft.nl)

Table S1. Water balance and constitutive equations of distributed hydrological model

| Reservoirs            | Water balance                                                         | Constitutive equations                                                                    |
|-----------------------|-----------------------------------------------------------------------|-------------------------------------------------------------------------------------------|
| Interception          | $\frac{ds_i}{dt} = P_{rain} - E_i - P_{re}$ (S4)                      | $P_{rain} = P, \text{ when } T > T_t$ (S10)                                               |
|                       |                                                                       | $E_i = \min(E_p, S_i/dt)$ (S11)                                                           |
|                       |                                                                       | $P_{re} = \max((S_i - S_{imax})/dt, 0)$ (S12)                                             |
| Snow                  | $\frac{ds_{snow}}{dt} = P_{snow} - M_{snow}$ (S5)                     | $P_{snow,e} = P, \text{ when } T_e \leq T_t$ (S13)                                        |
|                       |                                                                       | $P_{snow} = \sum P_{snow,e} \cdot W_e$ (S14)                                              |
|                       |                                                                       | $M_{snow,e} = \min(C_{melt} * (T_e - T_t), S_{snow,e}/dt), \text{ when } T_e > T_t$ (S15) |
|                       |                                                                       | $M_{snow} = \sum M_{snow,e} \cdot W_e$ (S16)                                              |
| Unsaturated reservoir | Forest/ Grass:<br>$\frac{ds_u}{dt} = P_e - E_a - R_u - R_{perc}$ (S6) | $P_e = P_{re} + M_{snow}$ (S17)                                                           |
|                       |                                                                       | $\rho = S_u/S_{umax}$ (S18)                                                               |
|                       | Wetland:<br>$\frac{ds_u}{dt} = P_e - E_a - R_u + R_{cap}$ (S7)        | $E_a = (E_p - E_i) * \min(\rho/C_a, 1)$ (S19)                                             |
|                       |                                                                       | $C_r = 1 - (1 - \rho)^y$ (S20)                                                            |
|                       |                                                                       | $R_u = (1 - C_r) * P_e$ (S21)                                                             |
|                       |                                                                       | $R_{perc} = \min(c_{pmax} * \rho, S_u/dt)$ (S22)                                          |
|                       |                                                                       | $R_{cap} = \min(c_{pmax} * (1 - \rho), \frac{S_s}{dt} * P_{HRU})$ (S23)                   |
|                       |                                                                       | $R_{pref} = (1 - D) * R_u$ (S24)                                                          |
| Fast reservoir        | $\frac{ds_f}{dt} = R_f - Q_f$ (S8)                                    | Forest/ Grass:<br>$R_f = D * R_u$ (S25)                                                   |
|                       |                                                                       | Wetland:<br>$R_f = R_u$ (S26)                                                             |
|                       |                                                                       | $Q_f = K_f * S_f$ (S27)                                                                   |
| Slow reservoir        | $\frac{ds_s}{dt} = R_{perctot} + R_{preftot} - R_{captot} - Q_s$ (S9) | $R_{perctot} = \sum R_{perc} \cdot P_{HRU}$ (S28)                                         |
|                       |                                                                       | $R_{preftot} = \sum R_{pref} \cdot P_{HRU}$ (S29)                                         |
|                       |                                                                       | $R_{captot} = \sum R_{cap} \cdot P_{HRU}$ (S30)                                           |
|                       |                                                                       | $Q_s = K_s * S_s$ (S31)                                                                   |

Table S2. Model parameters and their prior distributions in Borg\_MOEA method.

|           | Parameters  | Unit                | Description                                          | Parameter Constraints   | Prior distributions | References                                  |
|-----------|-------------|---------------------|------------------------------------------------------|-------------------------|---------------------|---------------------------------------------|
| Global    | $T_t$       | °C                  | Threshold temperature to split snowfall and rainfall |                         | -2.5-2.5            | (Gao et al., 2014; Hrachowitz et al., 2013) |
|           | $C_{melt}$  | mm °C <sup>-1</sup> | Melt factor                                          |                         | 1-5                 | (Prenner et al., 2018)                      |
|           | $C_a$       | -                   | Evapotranspiration coefficient                       |                         | 0.1-0.7             | (Gao et al., 2017)                          |
|           | $K_s$       | d <sup>-1</sup>     | Recession coefficient of slow response reservoir     |                         | 0.002-0.2           | (Prenner et al., 2018)                      |
| Forest    | $S_{imaxF}$ | mm                  | Interception capacity                                | $S_{imaxF} > S_{imaxG}$ | 0.1-5               | (Gao et al., 2014)                          |
|           | $S_{umaxF}$ | mm                  | Root zone storage capacity                           | $S_{umaxF} > S_{umaxG}$ | 50-500              | (Gao et al., 2014)                          |
|           | $\gamma_F$  | -                   | Shape parameter                                      |                         | 0.1-5               | (Gao et al., 2014)                          |
|           | $D$         | -                   | Splitter to fast and slow response reservoirs        |                         | 0-1                 | (Gao et al., 2014)                          |
|           | $C_{pmaxF}$ | mm d <sup>-1</sup>  | Percolation capacity                                 |                         | 0.1-4               | (Prenner et al., 2018)                      |
|           | $K_{fF}$    | d <sup>-1</sup>     | Recession coefficient of fast response reservoir     | $K_{fF} > K_s$          | 0.2-5               | (Hrachowitz et al., 2013)                   |
| Grassland | $S_{imaxG}$ | mm                  | Interception capacity                                |                         | 0.1-5               | (Gao et al., 2014)                          |
|           | $S_{umaxG}$ | mm                  | Root zone storage capacity                           | $S_{umaxG} > S_{umaxW}$ | 50-500              | (Gao et al., 2014)                          |
|           | $\gamma_G$  | -                   | Shape parameter                                      |                         | 0.1-5               | (Gao et al., 2014)                          |
|           | $C_{pmaxG}$ | mm d <sup>-1</sup>  | Percolation capacity                                 |                         | 0.1-4               | (Prenner et al., 2018)                      |
|           | $K_{fG}$    | d <sup>-1</sup>     | Recession coefficient of fast response reservoir     | $K_{fG} > K_s$          | 0.2-5               | (Hrachowitz et al., 2013)                   |
| Wetland   | $S_{umaxW}$ | mm                  | Root zone storage capacity                           | $S_{umaxW} < S_{umaxG}$ | 50-500              | (Gao et al., 2014)                          |
|           | $\gamma_W$  | -                   | Shape parameter                                      |                         | 0.1-5               | (Gao et al., 2014)                          |
|           | $C_{rmax}$  | mm d <sup>-1</sup>  | Percolation capacity                                 |                         | 0.1-4               | (Gao et al., 2014)                          |

Table S3. The performance metrics for the most balanced solution and the ranges of all performance metrics for the full set of pareto optimal solutions for the multi-objective calibration cases (Scenarios 1 – 2) are shown here.

|                          | Scenario 1      |                  | Scenario 2      |                  |                  |
|--------------------------|-----------------|------------------|-----------------|------------------|------------------|
|                          | T (1953-2022)   | t1 (1953-1972)   | t2 (1973-1992)  | t3 (1993-2012)   | t4 (2013-2022)   |
| NSE <sub>Q</sub>         | 0.59(0.06-0.55) | 0.60(-0.16-0.57) | 0.57(0.02-0.54) | 0.59(-0.32-0.52) | 0.56(-0.61-0.50) |
| NSE <sub>log(Q)</sub>    | 0.67(0.34-0.64) | 0.69(0.23-0.62)  | 0.65(0.30-0.59) | 0.63(-0.33-0.53) | 0.72(-0.77-0.66) |
| NSE <sub>FDClog(Q)</sub> | 0.96(0.92-0.99) | 0.96(0.94-0.99)  | 0.98(0.88-0.99) | 0.98(0.58-0.99)  | 0.97(0.16-0.99)  |
| NSE <sub>Cr</sub>        | 0.99(0.56-0.97) | 0.98(0.21-0.94)  | 0.87(0.47-0.96) | 0.95(0.27-0.94)  | 0.90(0.07-0.97)  |
| NSE <sub>AC</sub>        | 0.90(0.86-0.91) | 0.86(0.84-0.89)  | 0.91(0.86-0.93) | 0.90(0.87-0.92)  | 0.89(0.63-0.92)  |
| RE <sub>Cr,summer</sub>  | 0.83(0.82-0.89) | 0.90(0.81-0.90)  | 0.89(0.79-0.90) | 0.87(0.77-0.89)  | 0.84(0.69-0.88)  |
| RE <sub>Cr,winter</sub>  | 0.91(0.89-0.91) | 0.88(0.88-0.90)  | 0.92(0.92-0.93) | 0.90(0.89-0.91)  | 0.91(0.82-0.92)  |

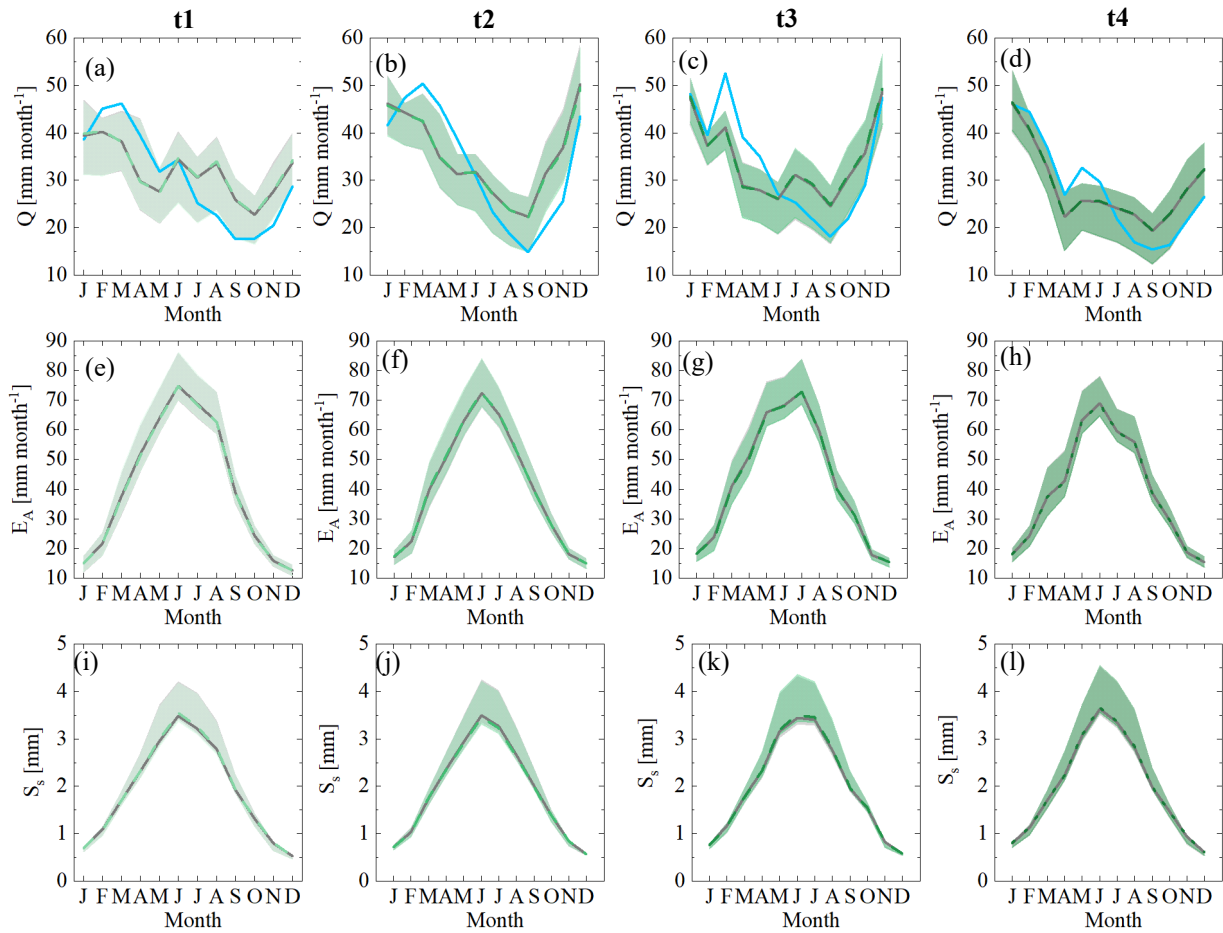

**Figure S1.** The mean monthly hydrological response of several flux and state variables for four sub-time periods  $t_1$ - $t_4$  based on two scenarios (gray shades: scenario 1, green shades: scenario 2). The mean monthly (a)-(d) streamflow  $Q$  (the blue lines indicate the observed streamflow), (e)-(h) actual evaporation  $E_A$  and (i)-(l) groundwater storage  $S_s$  are shown. The lines and shaded areas show the most balanced solution and 5th–95th percentiles based on the pareto front solutions retained as feasible.

## References

- Gao, H., Ding, Y., Zhao, Q., Hrachowitz, M., and Savenije, H. H.: The importance of aspect for modelling the hydrological response in a glacier catchment in Central Asia, *Hydrol. Process.*, 31, 2842-2859, <https://doi.org/10.1002/hyp.11224>, 2017.
- Gao, H., Hrachowitz, M., Fenicia, F., Gharari, S., and Savenije, H.: Testing the realism of a topography-driven model (FLEX-Topo) in the nested catchments of the Upper Heihe, China, *Hydrol. Earth Syst. Sci.*, 18, 1895-1915, <https://doi.org/10.5194/hess-18-1895-2014>, 2014.

Hrachowitz, M., Savenije, H., Bogaard, T., Tetzlaff, D., and Soulsby, C.: What can flux tracking teach us about water age distribution patterns and their temporal dynamics?, *Hydrol. Earth Syst. Sci.*, 17, 533-564, <https://doi.org/10.5194/hess-17-533-2013>, 2013.

Hrachowitz, M., Stockinger, M., Coenders-Gerrits, M., van der Ent, R., Bogen, H., Lücke, A., and Stumpp, C.: Reduction of vegetation-accessible water storage capacity after deforestation affects catchment travel time distributions and increases young water fractions in a headwater catchment, *Hydrol. Earth Syst. Sci.*, 25, 4887-4915, <https://doi.org/10.5194/hess-25-4887-2021>, 2021.

Prenner, D., Kaitna, R., Mostbauer, K., and Hrachowitz, M.: The value of using multiple hydrometeorological variables to predict temporal debris flow susceptibility in an alpine environment, *Water Resour. Res.*, 54, 6822-6843, <https://doi.org/10.1029/2018WR022985>, 2018.
